# Supplementary material for: Human plasma metabolomics for identifying differential metabolites and predicting molecular subtypes of breast cancer
Source: PubMed Central journal article supplement (PMC4891093; doi:10.18632/oncotarget.7155), 2016-02-03
Supplement: oncotarget-07-09925-s001.pdf [file oncotarget-07-09925-s001.pdf]

## SUPPLEMENTARY FIGURES AND TABLES

### SUPPLEMENTARY MATERIALS AND METHODS

#### Chemicals and reagents

Acetonitrile and formic acid (UPLC grade) were purchased from Roe (Nowark, USA). Chromatographic methanol and chloroform was purchased from Hanbang Tech Co. (Jiangsu, China). Methoxyamine hydrochloride and N-methyl-N-trimethylsilyltrifluoroacetamide (MSTFA) with 1% trimethylchlorosilane (TMCS) for derivation was obtained from Sigma-Aldrich (St. Louis, MO). Deionized water (18 MΩ/cm) was further purified by a Milli-Q system (Millipore, Milford, MA, USA). Standard compounds, including 2-isopropylmalic acid, glutamine, proline, methionine, tyrosine, phenylalanine, lysoPC (20:4), lysoPC (16:1), paraxanthine, ascorbic acid, malic acid, isoleucine, glycochenodeoxycholic acid, FFA (18:1), FFA (18:2), FFA (18:3), lactic acid, glycine, oxalic acid, leucine, glycerol, serine, threonine, aspartic acid, citric acid, D-fructose, D-glucose, palmitic acid, stearic acid, and cholesterol were purchased from Sigma-Aldrich (St. Louis, MO).

#### Plasma sample preparation and analysis by GC-Q/MS

A 100 μL aliquot of plasma sample was spiked with internal standard (15 μL 2-isopropylmalic acid in water, 1.0 mg/mL) and vortexed for 10 s. The mixed solution was extracted with 300 μL of methanol / chloroform / water (2.5 : 1 : 1) and shaken at 1,200 rpm for 30 min at 37°C before being centrifuged at 16,000 × g for 5 min at 4°C. An aliquot of 450 μL of the supernatant obtained was transferred to a clean tube, and 400 μL of distilled water were added to the tube. After being mixed, the solution was centrifuged at 16,000 × g for 5 min at 4°C, and 500 μL of the supernatant was transferred to a glass sampling vial and dried under a gentle stream of nitrogen at room temperature. The residue derivation involved the addition of 80 μL methoxyamine hydrochloride (20 mg/mL in pyridine), was added to the vial and kept at 37°C for 16 h followed by the addition of 40 μL of MSTFA (1% TMCS) for 60 min at 70°C.

Each 0.2 μL aliquot of the derivatized solution was injected in splitless mode into an Agilent 7890B gas chromatography coupled with an Agilent 5977A mass spectrometer. Separation was achieved on a HP-5MS capillary column (30 m×0.25 mm I.D., 0.25-μm film thickness; Agilent J & W Scientific, Folsom, CA, USA) with helium as the carrier gas at a constant flow rate of 0.7 mL/min. The solvent delay time was set to 5 min. The temperature of injection, transfer interface, and ion source

were set at 270°C, 290°C, and 230°C, respectively. The GC temperature programming was set to 2 min isothermal heating at 80°C, followed by 10°C/min oven temperature ramps to 300°C, and a final 6 min maintenance at 300°C. Electron impact ionization (70 eV) at full scan mode (m/z 30–600) was used.

#### Plasma sample preparation and analysis by UPLC-Q/TOF-MS

Fasting blood samples collected in the morning from all the subjects were stored in K2 EDTA vacutainer tubes and cooled down in freezer (4°C) at once. They were then centrifuged at 3000 × g for 10 min at 4°C within 2 h. Supernatants (plasma) were separated and transferred into new vials, and immediately stored frozen (-80°C) until sample preparation.

An aliquot of 150 μL of acetonitrile was added to 50 μL of plasma and the mixture was vortexed for 10 seconds. Then, at 4°C, the mixture was centrifuged for 10 minutes at a rotation speed of 13,000 rpm. After that, 150 μL of supernatant was transferred to a clean tube and dried under a gentle stream of nitrogen at room temperature. Finally, the dried supernatant was dissolved with 100 μL water/acetonitrile (4:1) solution and 1 μL of the sample injected for UPLC-Q/TOF-MS analysis.

The 1 μL aliquot of the supernatant was injected into a 100 mm × 2.1 mm, 1.7 μm Synchronis aQ C18 column (Thermo, USA) held at 45°C using an Agilent 1290 infinity system (Agilent technologies, Germany). Mobile phases consisted of water with 0.1% formic acid (A) and acetonitrile with 0.1% formic acid (B). The column was eluted with a linear gradient of 1-20% B over 0-1 min, 20-70% B over 1-3 min, 70-85% B over 3-8 min, 85-100% B over 8-9 min, the composition was held at 100% B for 1 min. The flow rate was set at 0.4 mL/min.

Mass spectrometry was performed on an Agilent 6530 Q-TOF/MS system (Agilent Technologies, USA) equipped with an electrospray ionization (ESI) source. The conditions of the ESI source were as follows: drying gas (N<sub>2</sub>) flow rate, 10.0 l/min; drying gas temperature, 320°C; nebulizer pressure, 35 psig; capillary voltage, 3500 V; fragmentor voltage, 120 V. The analysis was performed using full scan mode, and the mass range was set at 50-1000 Da.

Samples from NC participants and BC patients were alternated in random order in the analysis batch. Before analyzing the sample sequence, five QC samples were run. To visually evaluate chromatographic reproducibility, during analysis of the sample sequence, the QC sample was analyzed repeatedly within the analytical run after every ten plasma samples.

## Data processing methods

The acquired MS data (.d) from GC-MS and UPLC-Q/TOF-MS were exported to common data format (.mzdata) files by MassHunter Workstation Software (Version B.06.00, Agilent Technologies). The program XCMS (<http://metlin.scripps.edu/download/>) was applied for data pretreatment procedures such as nonlinear retention time alignment, peak discrimination, filtering, alignment, matching, and identification. peak alignment of the data in the time domain and automatic integration and extraction of the peak intensities. The 80% rule was used to treat the missing values for each sample group,

then a list of the intensities of each peak detected was generated, using retention time and the  $m/z$  data pairs as the parameters for each ion.

The partial least-squared discriminant analysis (PLS-DA) were used to identify the variables responsible for the discrimination. Variable importance in the projection (VIP) analysis was applied to obtain the significant variables for subsequent metabolic pathway analysis. We calculated the  $R^2Y$  (cum) to estimate the “goodness of fit” of the model, and  $Q^2$  (cum) to estimate the ability of prediction.

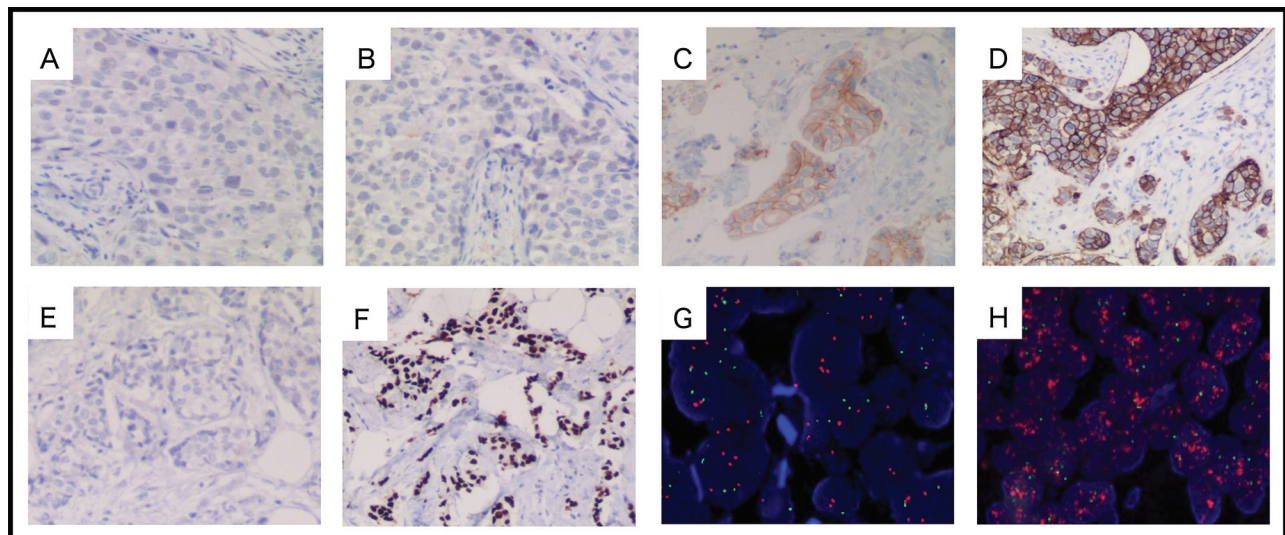

**Figure S1: Pathology of HER2 and ER status in breast cancer patients.** typical immunohistochemical pathology of A. HER2 (-), B. HER2 (+), C. HER2 (++), D. HER2 (+++), E. ER-negative, and F. ER-positive breast cancer patients; typical fluorescence *in situ* hybridization with the ratio of HER2 signals to CEP17 signals < 2.0 considered as non-amplified G. and those  $\geq 2.0$  considered as amplified H.

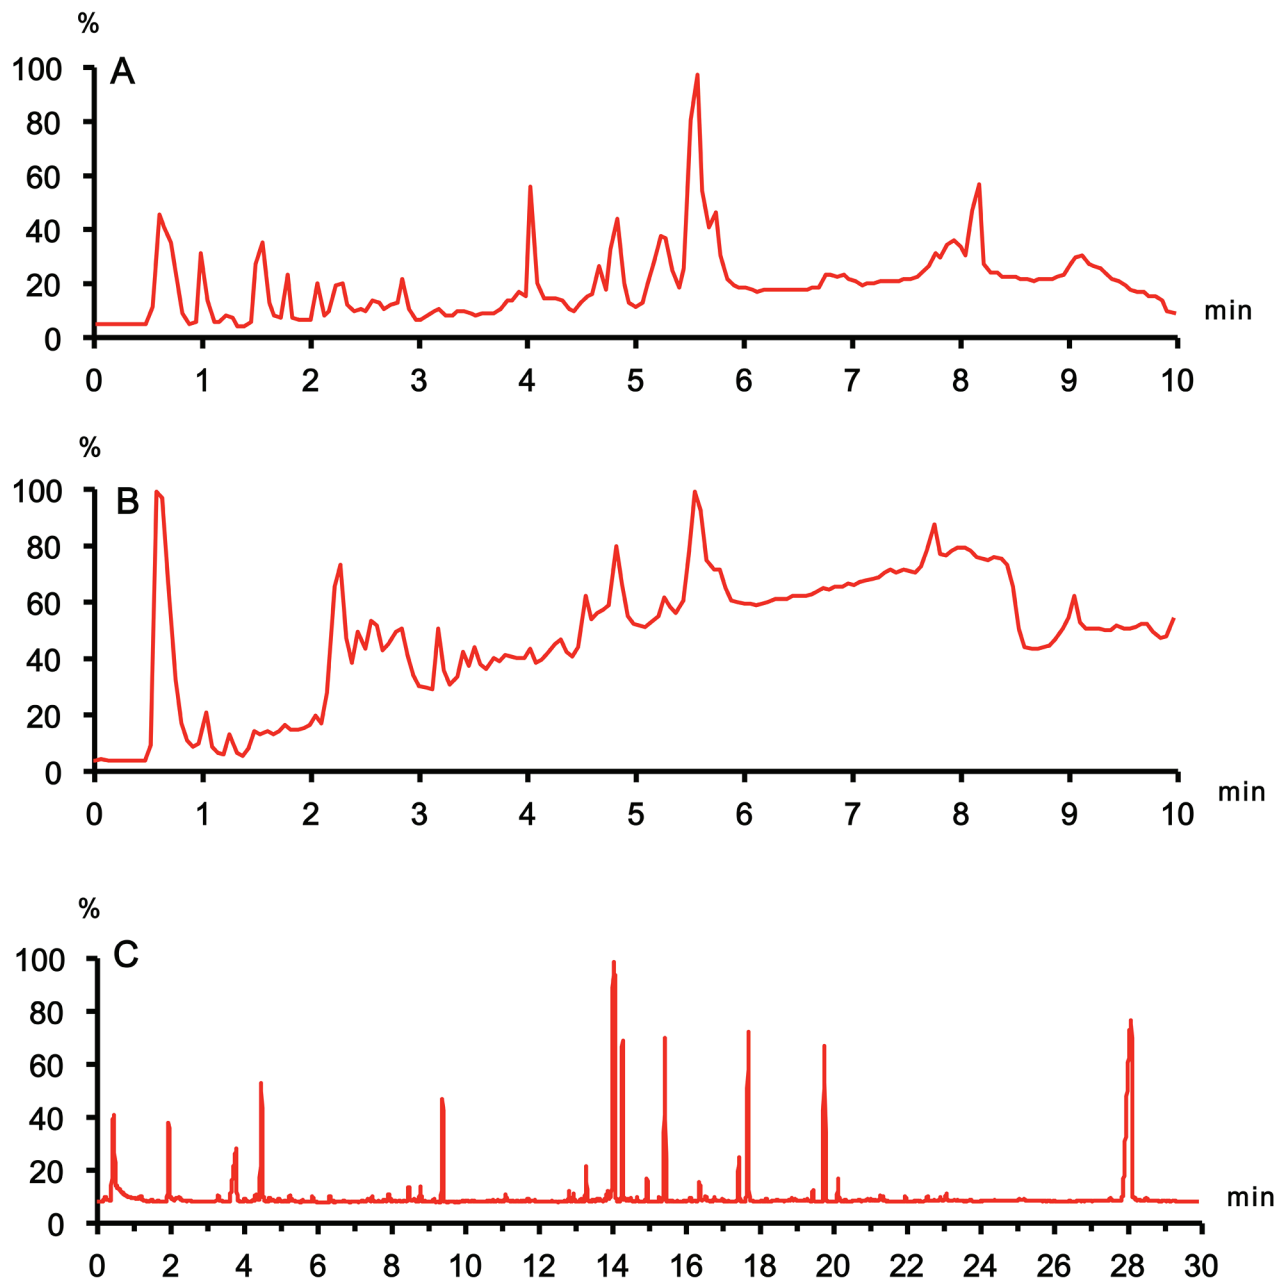

Figure S2: Typical total ion chromatograms (TICs) obtained from A. ESIfi, B. ESIfi, and C. GC-Q/MS.

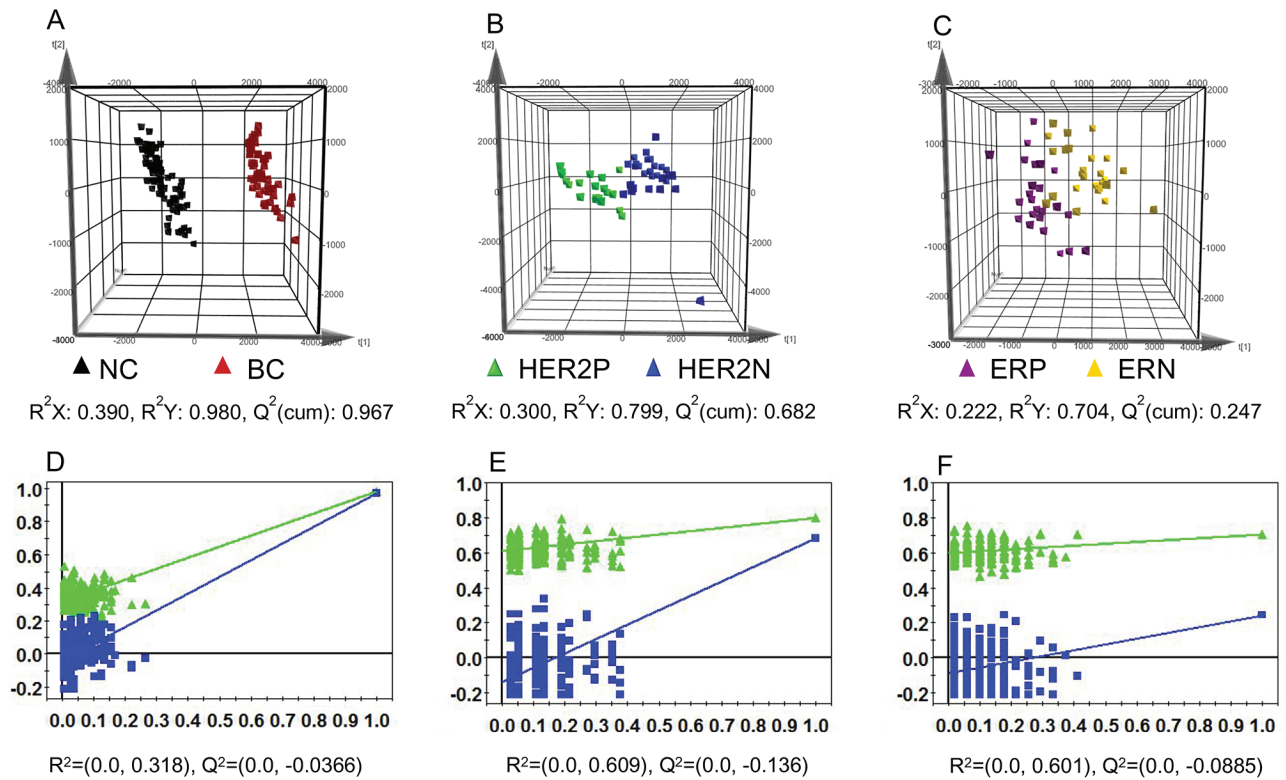

**Figure S3: PLS-DA loading plots and chance permutation test obtained from LC-MS in negative mode.** **A.** Normal control (NC) vs breast cancer (BC) group; **B.** HER2-positive (HER2P) vs HER2-negative (HER2N) BC group; **C.** ER-positive (ERP) vs ER-negative (ERN) group. Black triangle corresponds to NC group, red triangle corresponds to BC group, green triangle corresponds to HER2-positive BC patients, blue triangle corresponds to HER2-negative BC subjects, purple triangle corresponds to ER-positive participants, and yellow triangle corresponds to ER-negative patients. Chance permutation at 200 times for the discrimination between **D.** NC vs BC, **E.** HER2P vs HER2N, **F.** ERP vs ERN.

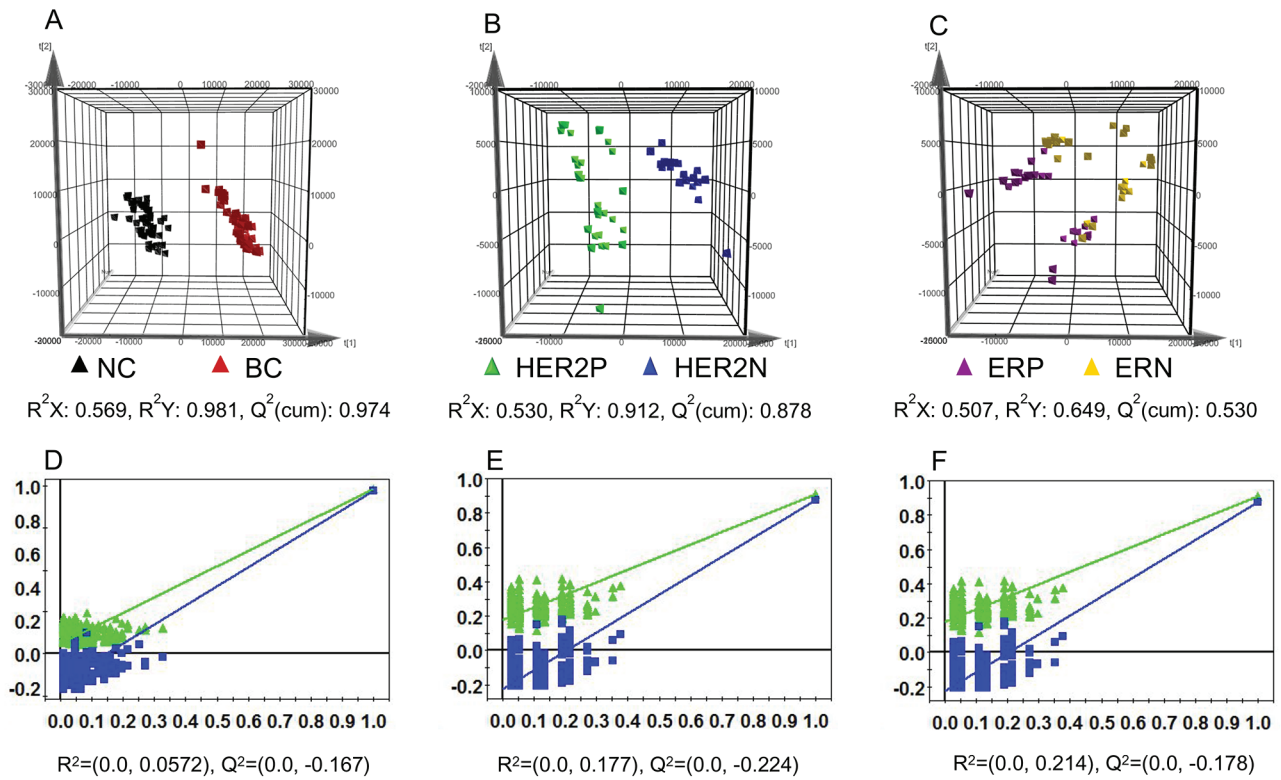

**Figure S4: PLS-DA loading plots and chance permutation test obtained from GC-MS. A.** Normal control (NC) vs breast cancer (BC) group; **B.** HER2-positive (HER2P) vs HER2-negative (HER2N) BC group; **C.** ER-positive (ERP) vs ER-negative (ERN) group. Black triangle corresponds to NC group, red triangle corresponds to BC group, green triangle corresponds to HER2-positive BC patients, blue triangle corresponds to HER2-negative BC subjects, purple triangle corresponds to ER-positive participants, and yellow triangle corresponds to ER-negative patients. Chance permutation at 200 times for the discrimination between **D.** NC vs BC, **E.** HER2P vs HER2N, **F.** ERP vs ERN.

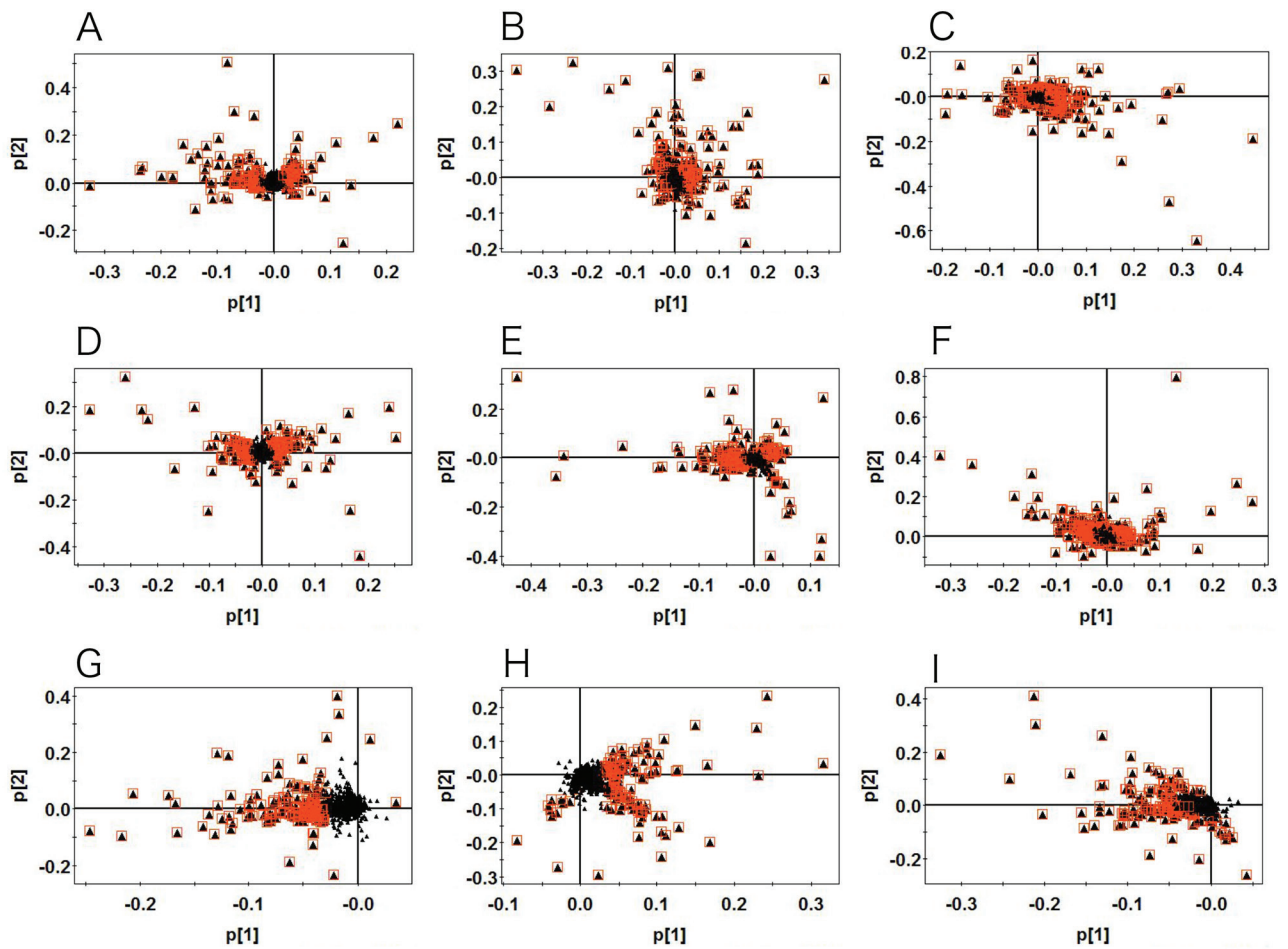

**Figure S5: PLS-DA loading plots for the discrimination between normal control (NC) vs breast cancer (BC) group; HER2-positive (HER2P) vs HER2-negative (HER2N) BC group; ER-positive (ERP) vs ER-negative (ERN) group by the peaks obtained from A-C. LC-MS in positive mode, D-F. LC-MS in negative mode, and G-I. GC-MS. VIP higher than 1 in loading plot was highlighted by red open circles.**

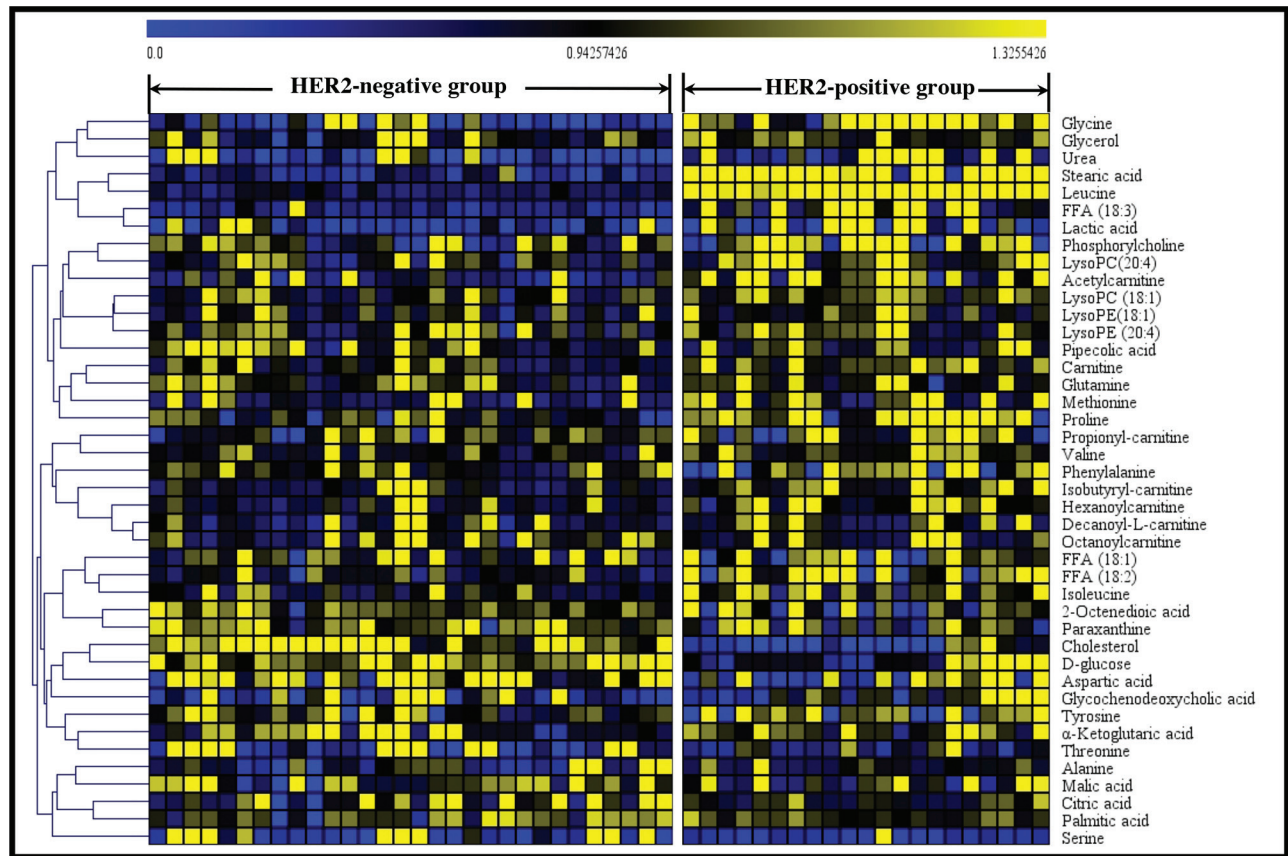

**Figure S6:** Heatmap of 40 differential metabolites between HER2-positive breast cancer (BC) and HER2-negative BC subjects. The colors from blue to yellow indicate the upregulated level of metabolites.

Table S1: Clinic pathologic characteristics of HER2 positive breast cancer patients enrolled in this study

| HER2-positive group (training set) |     |           |        |       | HER2-positive group (test set) |     |           |        |       |
|------------------------------------|-----|-----------|--------|-------|--------------------------------|-----|-----------|--------|-------|
| Patient                            | Age | ER status | TNM    | Stage | Patient                        | Age | ER status | TNM    | Stage |
| 1                                  | 46  | N         | T2N1M0 | IIIB  | 10                             | 71  | P         | T2N1M0 | IIIB  |
| 2                                  | 52  | N         | T2N0M0 | IIA   | 11                             | 52  | P         | T1N0M0 | I     |
| 3                                  | 43  | P         | T2N0M0 | IIA   | 15                             | 46  | P         | T2N0M0 | IIA   |
| 4                                  | 50  | N         | T2N0M0 | IIA   | 16                             | 45  | P         | T1N1M0 | IIA   |
| 5                                  | 55  | P         | T1N0M0 | I     | 20                             | 31  | P         | T2N1M0 | IIIB  |
| 6                                  | 82  | N         | T1N1M0 | IIA   | 23                             | 70  | P         | T2N1M0 | IIIB  |
| 7                                  | 59  | N         | T2N0M0 | IIA   | 25                             | 47  | N         | T2N0M0 | IIIB  |
| 8                                  | 73  | N         | T2N0M0 | IIA   | 26                             | 39  | N         | T3N1M0 | IIIA  |
| 9                                  | 50  | P         | T2N0M0 | IIA   | 27                             | 61  | N         | T1N0M0 | I     |
| 12                                 | 53  | N         | T2N0M0 | IIA   | 28                             | 65  | P         | T2N1M0 | IIIB  |
| 13                                 | 45  | N         | T2N1M0 | IIIB  | 29                             | 56  | N         | T2N0M0 | IIA   |
| 14                                 | 43  | N         | T2N0M0 | IIA   | 30                             | 44  | P         | T1N0M0 | I     |
| 17                                 | 70  | N         | T1N1M0 | IIA   | 31                             | 60  | N         | T1N1M0 | IIA   |
| 18                                 | 52  | N         | T2N0M0 | IIA   | 32                             | 35  | P         | T2N1M0 | IIIB  |
| 19                                 | 50  | N         | T3N0M0 | IIIB  | 33                             | 55  | N         | T1N1M0 | I     |
| 21                                 | 46  | N         | T2N0M0 | IIA   |                                |     |           |        |       |
| 22                                 | 33  | N         | T2N0M0 | IIA   |                                |     |           |        |       |
| 24                                 | 60  | N         | T2N1M0 | IIIB  |                                |     |           |        |       |
| 34                                 | 52  | P         | T2N0M0 | IIA   |                                |     |           |        |       |
| 35                                 | 70  | P         | T1N1M0 | I     |                                |     |           |        |       |
| 36                                 | 56  | P         | T2N0M0 | IIA   |                                |     |           |        |       |

P: positive; N: negative.



Table S2: Clinic pathologic characteristics of HER2 negative breast cancer patients enrolled in this study

| HER2-negative group (training set) |     |           |        |       | HER2-negative group (test set) |     |           |        |       |
|------------------------------------|-----|-----------|--------|-------|--------------------------------|-----|-----------|--------|-------|
| Patient                            | Age | ER status | TNM    | Stage | Patient                        | Age | ER status | TNM    | Stage |
| 1                                  | 70  | N         | T1N0M0 | I     | 31                             | 52  | N         | T2N0M0 | IIA   |
| 2                                  | 47  | N         | T2N0M0 | IIA   | 32                             | 67  | N         | T2N0M0 | IIA   |
| 3                                  | 44  | N         | T2N0M0 | IIA   | 33                             | 63  | N         | T1N0M0 | I     |
| 4                                  | 59  | N         | T2N0M0 | IIA   | 34                             | 46  | N         | T1N1M0 | IIA   |
| 5                                  | 47  | N         | T2N1M0 | IIIB  | 35                             | 46  | N         | T2N0M0 | IIA   |
| 6                                  | 53  | N         | T2N1M0 | IIIB  | 36                             | 38  | N         | T2N0M0 | IIA   |
| 7                                  | 58  | N         | T1N1M0 | IIA   | 37                             | 41  | N         | T2N0M0 | IIA   |
| 8                                  | 67  | N         | T2N0M0 | IIA   | 38                             | 56  | N         | T3N0M0 | IIIB  |
| 9                                  | 40  | N         | T1N0M0 | I     | 39                             | 43  | P         | T2N1M0 | IIIB  |
| 10                                 | 35  | N         | T2N1M0 | IIIB  | 40                             | 63  | P         | T1N0M0 | I     |
| 11                                 | 55  | P         | T2N0M0 | IIA   | 41                             | 33  | P         | T2N1M0 | IIIB  |
| 12                                 | 45  | P         | T3N0M0 | IIIB  | 42                             | 35  | P         | T1N1M0 | I     |
| 13                                 | 42  | P         | T1N1M0 | I     | 43                             | 70  | P         | T2N0M0 | IIA   |
| 14                                 | 75  | P         | T1N0M0 | I     | 44                             | 70  | P         | T1N0M0 | I     |
| 15                                 | 52  | P         | T1N0M0 | I     | 45                             | 49  | P         | T1N0M0 | I     |
| 16                                 | 39  | P         | T1N1M0 | IIA   | 46                             | 35  | P         | T2N1M0 | IIIB  |
| 17                                 | 62  | P         | T1N0M0 | I     | 47                             | 44  | P         | T2N1M0 | IIIB  |
| 18                                 | 62  | P         | T1N1M0 | I     | 48                             | 43  | P         | T2N1M0 | IIIB  |
| 19                                 | 43  | P         | T2N1M0 | IIIB  | 49                             | 37  | P         | T3N1M0 | IIIA  |
| 20                                 | 60  | P         | T1N0M0 | I     | 50                             | 59  | P         | T1N0M0 | I     |
| 21                                 | 45  | P         | T1N0M0 | I     | 51                             | 77  | P         | T1N0M0 | I     |
| 22                                 | 73  | P         | T1N0M0 | I     | 52                             | 45  | P         | T2N0M0 | IIA   |
| 23                                 | 63  | P         | T1N0M0 | I     | 53                             | 54  | P         | T1N0M0 | I     |
| 24                                 | 45  | P         | T1N0M0 | I     | 54                             | 57  | P         | T1N0M0 | I     |
| 25                                 | 62  | P         | T1N0M0 | I     | 55                             | 60  | P         | T1N0M0 | I     |
| 26                                 | 56  | P         | T1N0M0 | I     | 56                             | 47  | P         | T2N0M0 | IIA   |
| 27                                 | 46  | P         | T2N1M0 | IIIB  | 57                             | 55  | P         | T2N0M0 | IIA   |
| 28                                 | 62  | P         | T2N1M0 | IIIB  | 58                             | 62  | P         | T2N0M0 | IIA   |
| 29                                 | 42  | P         | T1N0M0 | I     | 59                             | 78  | P         | T2N0M0 | IIA   |
| 30                                 | 51  | P         | T2N1M0 | IIIB  | 60                             | 34  | P         | T2N0M0 | IIA   |

P: positive; N: negative.

Table S3: Differential metabolites identified between breast cancer and normal control plasma and their pathway involved

| No.                    | $t_R$ (min) | $m/z$    | Metabolites          | Formula                                                      | Fold change | $p$ value | VIP <sup>a</sup> | Pathway involved                            |
|------------------------|-------------|----------|----------------------|--------------------------------------------------------------|-------------|-----------|------------------|---------------------------------------------|
| <b>ESI<sup>+</sup></b> |             |          |                      |                                                              |             |           |                  |                                             |
| 1                      | 0.676       | 147.0604 | Glutamine*           | C <sub>5</sub> H <sub>10</sub> N <sub>2</sub> O <sub>3</sub> | 1.400       | <0.001    | 0.992            | Alanine, aspartate and glutamate metabolism |
| 2                      | 0.733       | 162.1124 | Carnitine            | C <sub>7</sub> H <sub>15</sub> NO <sub>3</sub>               | 1.428       | <0.001    | 3.935            | Fatty acid transportation                   |
| 3                      | 0.733       | 116.0711 | Proline*             | C <sub>5</sub> H <sub>9</sub> NO <sub>2</sub>                | 1.452       | 0.008     | 2.378            | Arginine and proline metabolism             |
| 4                      | 0.959       | 72.0820  | Pyrrolidine          | C <sub>4</sub> H <sub>9</sub> N                              | 0.533       | 0.004     | 2.644            | Others                                      |
| 5                      | 0.959       | 118.0869 | Valine*              | C <sub>3</sub> H <sub>11</sub> NO <sub>2</sub>               | 0.733       | 0.016     | 4.817            | Valine, leucine and isoleucine metabolism   |
| 6                      | 1.015       | 204.1231 | Acetylcarnitine      | C <sub>9</sub> H <sub>17</sub> NO <sub>4</sub>               | 1.338       | 0.008     | 3.138            | Fatty acid transportation                   |
| 7                      | 1.015       | 130.0861 | Pipecolic acid       | C <sub>6</sub> H <sub>11</sub> NO <sub>2</sub>               | 0.621       | <0.001    | 2.650            | Protein synthesis, amino acid biosynthesis  |
| 8                      | 1.242       | 150.0548 | Methionine*          | C <sub>5</sub> H <sub>11</sub> NO <sub>2</sub> S             | 0.463       | <0.001    | 2.594            | Cysteine and methionine metabolism          |
| 9                      | 1.468       | 182.0815 | Tyrosine*            | C <sub>9</sub> H <sub>11</sub> NO <sub>3</sub>               | 0.498       | <0.001    | 3.787            | Aminoacyl-tRNA biosynthesis                 |
| 10                     | 1.638       | 218.1378 | Propionyl-carnitine  | C <sub>10</sub> H <sub>19</sub> NO <sub>4</sub>              | 0.630       | 0.040     | 1.792            | Fatty acid transportation                   |
| 11                     | 1.751       | 166.0871 | Phenylalanine*       | C <sub>9</sub> H <sub>11</sub> NO <sub>2</sub>               | 0.630       | 0.022     | 3.657            | Aminoacyl-tRNA biosynthesis                 |
| 12                     | 1.977       | 232.1545 | Isobutyryl-carnitine | C <sub>11</sub> H <sub>21</sub> NO <sub>4</sub>              | 0.434       | 0.003     | 1.266            | Fatty acid transportation                   |
| 13                     | 2.712       | 260.1855 | Hexanoylcarnitine    | C <sub>13</sub> H <sub>25</sub> NO <sub>4</sub>              | 0.357       | <0.001    | 1.241            | Fatty acid transportation                   |
| 14                     | 3.448       | 288.2172 | Octanoylcarnitine    | C <sub>15</sub> H <sub>29</sub> NO <sub>4</sub>              | 0.224       | <0.001    | 3.182            | Fatty acid transportation                   |
| 15                     | 4.24        | 502.2933 | LysoPE (20:4)        | C <sub>25</sub> H <sub>44</sub> NO <sub>7</sub> P            | 0.903       | 0.002     | 1.162            | Lysophospholipid catabolism                 |
| 16                     | 4.296       | 468.3086 | LysoPC(14:0)         | C <sub>22</sub> H <sub>46</sub> NO <sub>7</sub> P            | 0.223       | <0.001    | 3.754            | Glycerophospholipid catabolism              |
| 17                     | 4.409       | 316.2485 | Decanoyl-L-carnitine | C <sub>17</sub> H <sub>33</sub> NO <sub>4</sub>              | 0.205       | <0.001    | 3.527            | Fatty acid transportation                   |
| 18                     | 4.466       | 494.3242 | LysoPC(16:1)*        | C <sub>24</sub> H <sub>48</sub> NO <sub>7</sub> P            | 0.395       | <0.001    | 3.696            | Glycerophospholipid catabolism              |
| 19                     | 4.579       | 568.3386 | LysoPC (22:6)        | C <sub>30</sub> H <sub>50</sub> NO <sub>7</sub> P            | 0.682       | 0.045     | 2.576            | Glycerophospholipid catabolism              |

(continued)

| No.                    | $t_R$ (min) | $m/z$    | Metabolites                  | Formula                                                     | Fold change | $p$ value | VIP <sup>a</sup> | Pathway involved                          |
|------------------------|-------------|----------|------------------------------|-------------------------------------------------------------|-------------|-----------|------------------|-------------------------------------------|
| 20                     | 4.636       | 544.3397 | LysoPC(20:4)*                | C <sub>28</sub> H <sub>50</sub> NO <sub>7</sub> P           | 0.457       | <0.001    | 7.975            | Glycerophospholipid catabolism            |
| 21                     | 4.692       | 454.2957 | LysoPE (16:0)                | C <sub>21</sub> H <sub>44</sub> NO <sub>7</sub> P           | 0.468       | <0.001    | 1.512            | Lysophospholipid catabolism               |
| 22                     | 4.749       | 184.0734 | Phosphorylcholine            | C <sub>5</sub> H <sub>14</sub> NO <sub>4</sub> P            | 0.521       | <0.001    | 1.303            | Glycerophospholipid catabolism            |
| 23                     | 4.805       | 542.3224 | LysoPC (20:5)                | C <sub>28</sub> H <sub>48</sub> NO <sub>7</sub> P           | 0.354       | 0.002     | 1.497            | Glycerophospholipid catabolism            |
| 24                     | 4.805       | 482.3233 | LysoPC(15:0)                 | C <sub>23</sub> H <sub>48</sub> NO <sub>7</sub> P           | 0.442       | <0.001    | 2.792            | Glycerophospholipid catabolism            |
| 25                     | 4.862       | 520.3393 | LysoPC (18:2)                | C <sub>26</sub> H <sub>50</sub> NO <sub>7</sub> P           | 0.859       | 0.002     | 5.887            | Glycerophospholipid catabolism            |
| 26                     | 4.862       | 480.3079 | LysoPE(18:1)                 | C <sub>23</sub> H <sub>46</sub> NO <sub>7</sub> P           | 0.681       | 0.008     | 1.578            | Lysophospholipid catabolism               |
| 27                     | 4.862       | 570.3547 | LysoPC(22:5)                 | C <sub>30</sub> H <sub>52</sub> NO <sub>7</sub> P           | 0.637       | 0.004     | 1.226            | Glycerophospholipid catabolism            |
| 28                     | 5.088       | 508.3396 | LysoPE(20:1)                 | C <sub>25</sub> H <sub>50</sub> NO <sub>7</sub> P           | 0.303       | <0.001    | 1.929            | Lysophospholipid catabolism               |
| 29                     | 5.145       | 546.3559 | LysoPC(20:3)                 | C <sub>28</sub> H <sub>52</sub> NO <sub>7</sub> P           | 0.489       | <0.001    | 2.573            | Glycerophospholipid catabolism            |
| 30                     | 5.654       | 522.3550 | LysoPC (18:1)                | C <sub>26</sub> H <sub>52</sub> NO <sub>7</sub> P           | 0.667       | <0.001    | 8.281            | Glycerophospholipid catabolism            |
| 31                     | 6.05        | 548.3704 | LysoPC(20:2)                 | C <sub>28</sub> H <sub>54</sub> NO <sub>7</sub> P           | 0.385       | <0.001    | 1.636            | Glycerophospholipid catabolism            |
| 32                     | 6.389       | 510.3560 | LysoPE(20:0)                 | C <sub>25</sub> H <sub>52</sub> NO <sub>7</sub> P           | 0.352       | <0.001    | 2.190            | Lysophospholipid metabolism               |
| 33                     | 6.728       | 280.2635 | Linoleamide                  | C <sub>18</sub> H <sub>33</sub> NO                          | 1.154       | 0.033     | 3.320            | Others                                    |
| 34                     | 7.803       | 550.3858 | LysoPC(20:1)                 | C <sub>28</sub> H <sub>56</sub> NO <sub>7</sub> P           | 0.293       | <0.001    | 1.173            | Glycerophospholipid catabolism            |
| 35                     | 8.029       | 256.2642 | Palmitic amide               | C <sub>16</sub> H <sub>33</sub> NO                          | 0.686       | 0.001     | 3.759            | Others                                    |
| <b>ESI<sup>-</sup></b> |             |          |                              |                                                             |             |           |                  |                                           |
| 36                     | 0.688       | 179.0579 | Paraxanthine*                | C <sub>7</sub> H <sub>8</sub> N <sub>4</sub> O <sub>2</sub> | 1.214       | <0.001    | 1.002            | Purine metabolism                         |
| 37                     | 0.907       | 145.0139 | $\alpha$ -Ketoglutaric acid* | C <sub>5</sub> H <sub>6</sub> O <sub>5</sub>                | 0.428       | <0.001    | 0.238            | Tricarboxylic acid cycle                  |
| 38                     | 0.914       | 175.0248 | Ascorbic acid*               | C <sub>6</sub> H <sub>8</sub> O <sub>6</sub>                | 0.253       | <0.001    | 1.849            | Ascorbic acid                             |
| 39                     | 1.423       | 133.0139 | Malic acid*                  | C <sub>4</sub> H <sub>6</sub> O <sub>5</sub>                | 0.410       | 0.037     | 0.712            | Tricarboxylic acid cycle                  |
| 40                     | 1.536       | 130.0871 | Isoleucine*                  | C <sub>6</sub> H <sub>13</sub> NO <sub>2</sub>              | 1.082       | 0.031     | 1.424            | Valine, leucine and isoleucine metabolism |
| 41                     | 2.611       | 171.0659 | 2-Octenedioic acid           | C <sub>8</sub> H <sub>12</sub> O <sub>4</sub>               | 1.358       | <0.001    | 3.623            | Others                                    |

(continued)

| No.          | $t_R$ (min) | $m/z$    | Metabolites                 | Formula              | Fold change | $p$ value | VIP <sup>a</sup> | Pathway involved                            |
|--------------|-------------|----------|-----------------------------|----------------------|-------------|-----------|------------------|---------------------------------------------|
| 42           | 3.403       | 338.9859 | Fructose 1,6-bisphosphate   | $C_6H_{14}O_{12}P_2$ | 0.603       | <0.001    | 0.513            | Glycolysis metabolism                       |
| 43           | 3.573       | 448.3075 | Glycochenodeoxycholic acid* | $C_{26}H_{43}NO_5$   | 0.679       | 0.016     | 1.834            | Bile acid biosynthesis                      |
| 44           | 5.092       | 297.2435 | 3-Oxo-octadecanoic acid     | $C_{18}H_{34}O_3$    | 1.219       | <0.001    | 0.812            | Fatty acid metabolism                       |
| 45           | 6.684       | 277.2174 | FFA (18:3) *                | $C_{18}H_{30}O_2$    | 5.758       | <0.001    | 0.620            | Biosynthesis of unsaturated fatty acids     |
| 46           | 7.532       | 279.2322 | FFA (18:2)*                 | $C_{18}H_{32}O_2$    | 1.861       | <0.001    | 1.785            | Biosynthesis of unsaturated fatty acids     |
| 47           | 8.833       | 281.2486 | FFA (18:1) *                | $C_{18}H_{34}O_2$    | 1.420       | <0.001    | 0.701            | Biosynthesis of unsaturated fatty acids     |
| <b>GC-MS</b> |             |          |                             |                      |             |           |                  |                                             |
| 48           | 6.299       |          | Lactic acid*                | $C_3H_6O_3$          | 2.401       | <0.001    | 1.057            | Glycolysis metabolism                       |
| 49           | 6.904       |          | Alanine*                    | $C_3H_7NO_2$         | 0.427       | <0.001    | 1.003            | Alanine and aspartate metabolism            |
| 50           | 7.117       |          | Glycine*                    | $C_2H_5NO_2$         | 0.697       | 0.003     | 2.421            | Glycine, serine and threonine metabolism    |
| 51           | 7.493       |          | Oxalic acid*                | $C_2H_2O_4$          | 0.262       | 0.006     | 2.422            | Others                                      |
| 52           | 8.879       |          | Urea                        | $CH_4N_2O$           | 0.341       | <0.001    | 1.000            | Urea cycle                                  |
| 53           | 9.304       |          | Leucine*                    | $C_6H_{13}NO_2$      | 0.847       | 0.007     | 1.337            | Valine, leucine and isoleucine metabolism   |
| 54           | 9.403       |          | Glycerol*                   | $C_3H_8O_3$          | 1.212       | <0.001    | 1.562            | Glycerophospholipid metabolism              |
| 55           | 10.612      |          | Serine*                     | $C_3H_7NO_3$         | 0.144       | 0.012     | 0.678            | Glycine, serine and threonine metabolism    |
| 56           | 10.957      |          | Threonine*                  | $C_4H_9NO_3$         | 0.084       | <0.001    | 0.702            | Glycine, serine and threonine metabolism    |
| 57           | 11.871      |          | Aspartic acid*              | $C_4H_7NO_4$         | 0.332       | <0.001    | 0.967            | Alanine, aspartate and glutamate metabolism |
| 58           | 16.230      |          | Citric acid*                | $C_6H_8O_7$          | 0.790       | <0.001    | 1.418            | Tricarboxylic acid cycle                    |
| 59           | 16.969      |          | D-fructose*                 | $C_6H_{12}O_5$       | 0.273       | <0.001    | 1.393            | Others                                      |
| 60           | 17.034      |          | D-glucose*                  | $C_6H_{12}O_6$       | 0.307       | <0.001    | 1.426            | Glycolysis metabolism                       |

(continued)

| No. | $t_R$ (min) | $m/z$ | Metabolites          | Formula                                        | Fold change | $p$ value | VIP <sup>a</sup> | Pathway involved                                |
|-----|-------------|-------|----------------------|------------------------------------------------|-------------|-----------|------------------|-------------------------------------------------|
| 61  | 18.045      |       | Palmitic acid*       | C <sub>16</sub> H <sub>32</sub> O <sub>2</sub> | 1.328       | <0.001    | 1.638            | Fatty acid biosynthesis                         |
| 62  | 19.862      |       | Stearic acid*        | C <sub>18</sub> H <sub>36</sub> O <sub>2</sub> | 1.058       | <0.001    | 1.924            | Fatty acid biosynthesis                         |
| 63  | 22.730      |       | Glycerol 1-palmitate | C <sub>19</sub> H <sub>38</sub> O <sub>4</sub> | 1.632       | <0.001    | 1.545            | Glycerophospholipid catabolism                  |
| 64  | 27.843      |       | Cholesterol*         | C <sub>27</sub> H <sub>46</sub> O              | 0.719       | <0.001    | 3.006            | Hormone biosynthesis and bile acid biosynthesis |

\* confirmed with reference standards;

<sup>a</sup> fold change >1 indicates that the average normalized peak area ratio in HER2-positive group is larger than that in HER2-negative group;

<sup>b</sup> variable importance in the projection.
